# Supplementary material for: Fabrication of polymer capsules by an original multifunctional, active, amphiphilic macromolecule, and its application in preparing PCM microcapsules
Source: Royal Society of Chemistry journal article supplement (doi:10.1039/c8nj00546j), 2018-01-01
Supplement: c8nj00546j1.pdf [file c8nj00546j1.pdf]

## Supplementary Information

*New Journal of Chemistry*

### Fabrication of polymer capsules by an original multifunctional active amphiphilic macromolecule and its application in PCMs microcapsules

Jin Liu, Xinlong Fan, Ying Xue, Yibin Liu, Lixun Song, Rumin Wang, Hepeng Zhang and Qiuyu Zhang\*

*Key Laboratory of Applied Physics and Chemistry in Space of Ministry of Education, School of Science, Northwestern Polytechnical University, No. 127, West Youyi Road, Xi'an 710072, Shaanxi, China*

*E-mail: qyzhang@nwpu.edu.cn*

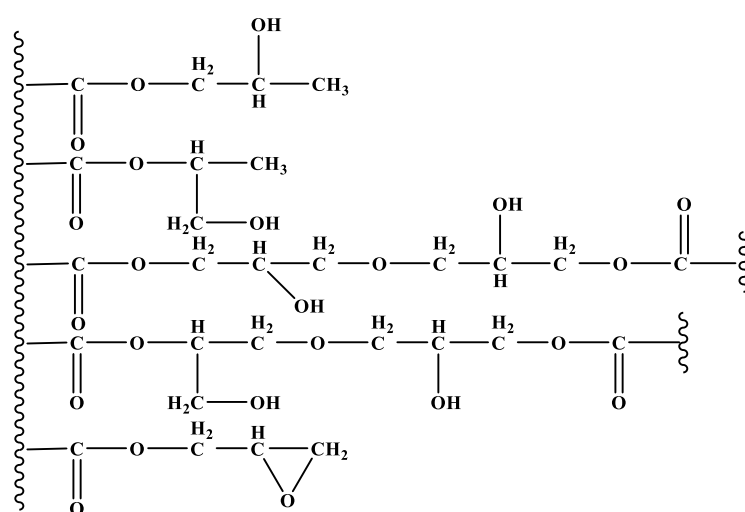

**Figure S1** Structural formula of hydrolyzed D-PGMA.

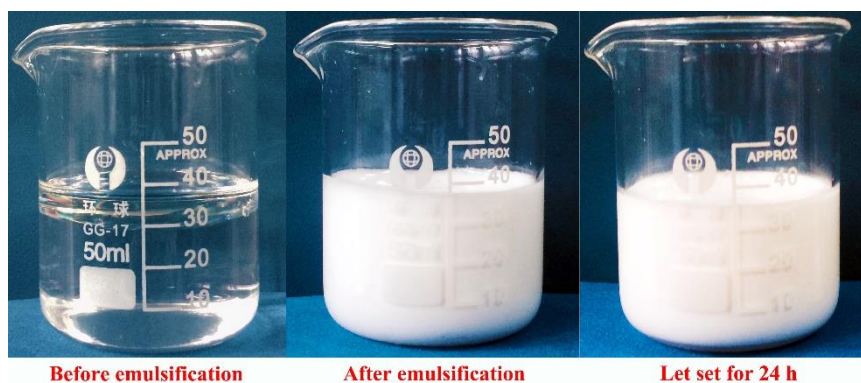

**Figure S2** Emulsion of MMA monomer droplets emulsified by D-PGMA.

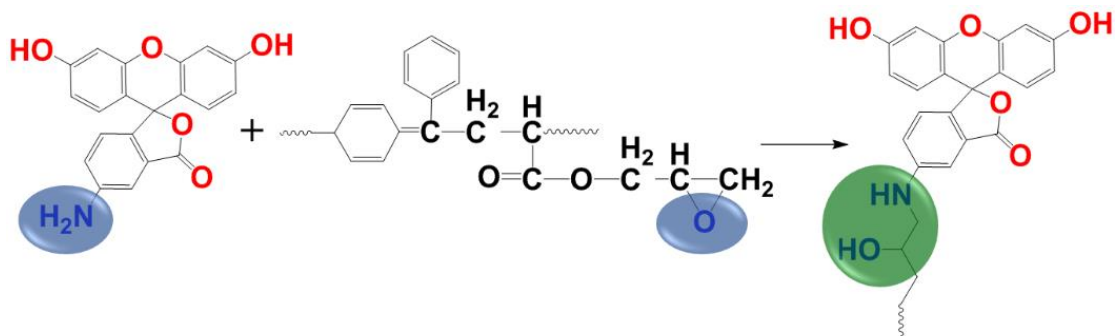

**Scheme S1** Scheme for the preparation of 5-amino fluorescein tagged D-PGMA.

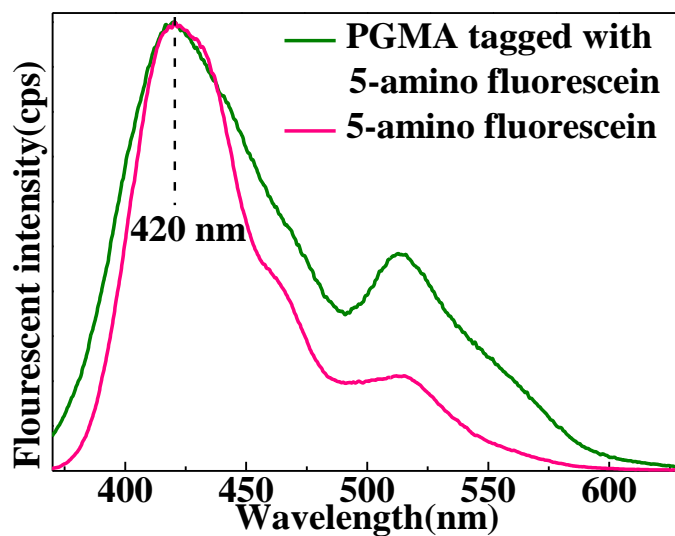

**Figure S3** Fluorescence spectra of 5-amino fluorescein and D-PGMA tagged with 5-amino fluorescein.

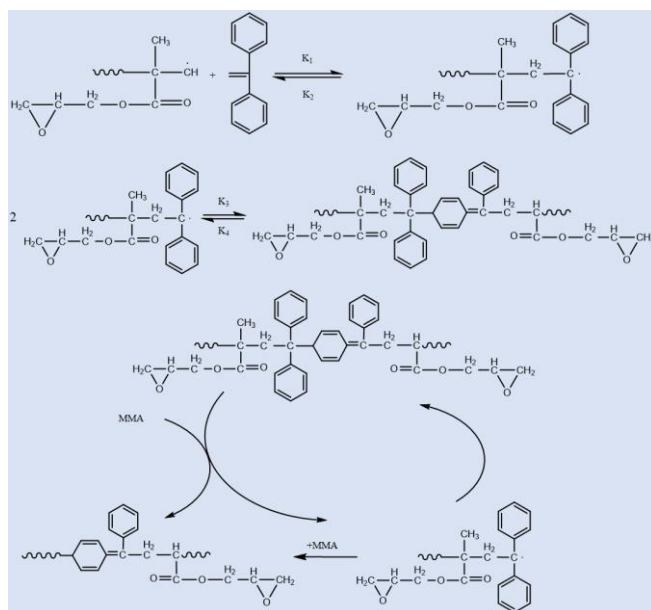

**Figure S4** The mechanism of DPE controlled radical polymerization.

**Table S1** Detailed recipes for the preparation of microcapsules and PCMs microcapsules.

| Sample | MMA (g) | 1-octadecane (g) | D-PGMA (g) | Water (ml) |
|--------|---------|------------------|------------|------------|
| 1      | 14.00   | /                | 28.00      | 158        |
| 4      | 14.00   | 14.00            | 14.00      | 158        |

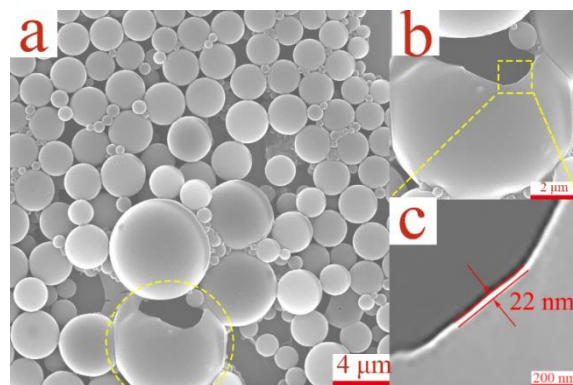

**Figure S5** SEM images of P(D-PGMA-MMA) capsules prepared with a mass ratio of D-PGMA/MMA=7%/14%.

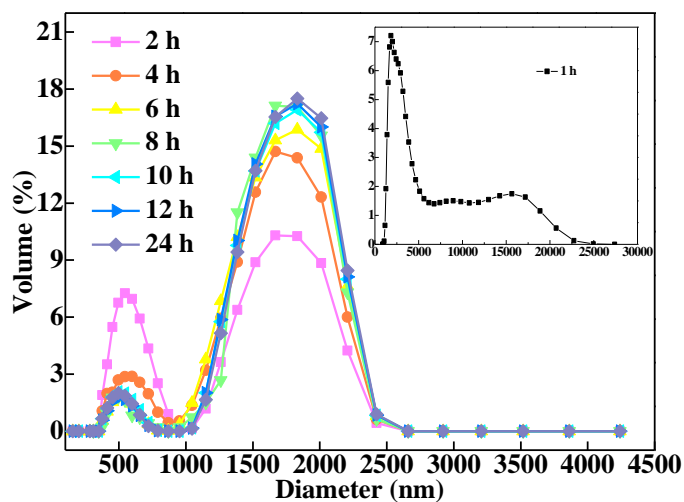

**Figure S6** Size distributions of P(D-PGMA-MMA) particles at different times.

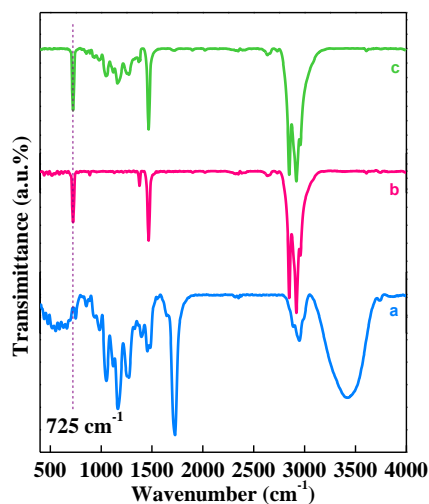

**Figure S7** FT-IR spectra of different polymers. Figure S6: (a) P(D-PGMA-MMA); (b) pure 1-octadecane; (c) 1-octadecane@P(D-PGMA-MMA).

**Table S2** Encapsulation ratio of different PCMs microcapsules.

| No. | Shell materials           | Core materials                                                      | Method of encapsulation                      | Encapsulation ratio | Literature                                            |
|-----|---------------------------|---------------------------------------------------------------------|----------------------------------------------|---------------------|-------------------------------------------------------|
| 1   | P(ODMA-MAA)               | n-octadecane                                                        | Suspension-like polymerization               | 42%                 | <i>Energy</i> , 2014, 68, 160                         |
| 2   | Calcium carbonate         | Paraffin wax                                                        | Self-assembly method                         | 59.4%               | <i>Appl. Energy</i> , 2016, 171, 113                  |
| 3   | High density polyethylene | Paraffin wax                                                        | Situ polymerization                          | 43%                 | <i>Energy Convers. Manage.</i> , 2014, 87, 400        |
| 4   | Cross linked PMMA         | RubithermsRT21                                                      | Suspension polymerization                    | 85.6%               | <i>Sol. Energy Mater. Sol. Cells</i> , 2015, 132, 311 |
| 5   | Cross linked PMMA         | n-hexadecane                                                        | Emulsion polymerization                      | 61.4%               | <i>Thermochim. Acta</i> , 2011, 518, 1                |
| 6   | Cross linked PMMA         | n-octadecane                                                        | Suspension polymerization                    | 75.3%               | <i>Sol. Energy Mater. Sol. Cells</i> , 2012, 98, 283  |
| 7   | P(MMA-co-MA-co-MAA)       | PRS paraffin wax                                                    | Suspension polymerization                    | 41.7%               | <i>Ind. Eng. Chem. Res.</i> , 2010, 49, 12204         |
| 8   | P(St-MMA)                 | PRS paraffin wax                                                    | suspension polymerization                    | 43.2%               | <i>Chem. Eng. J.</i> , 2010, 157, 216                 |
| 9   | PMMA                      | Paraffin                                                            | UV irradiation                               | 61.2%               | <i>Sol. Energy Mater. Sol. Cells</i> , 2010, 94, 1643 |
| 10  | PMMA                      | paraffin wax                                                        | UV irradiation                               | 66%                 | <i>Mater. Chem. Phys.</i> , 2012, 135, 181            |
| 11  | PMMA-Silica Hybrid Shell  | n-octadecane                                                        | Sol-Gel Process                              | 73.3%               | <i>J. Appl. Polym. Sci.</i> , 2009, 112, 1850         |
| 12  | Modified PMMA             | (Na <sub>2</sub> HPO <sub>4</sub> · 7H <sub>2</sub> O) Hydrate Salt | Suspension copolymerization-solvent volatile | 84%                 | <i>Thermochim. Acta</i> , 2013, 557, 1                |
| 13  | LDPE-EVA copolymer        | RubithermsRT27                                                      | Spry drying                                  | 63%                 | <i>Colloid Polym. Sci.</i> , 2011, 289, 169           |
| 14  | Polyurea                  | n-octadecane                                                        | Interfacial polymerization                   | 83%                 | <i>Engineering Aspects</i> , 2013, 422, 61            |
